# Supplementary material for: Improved Sendai viral system for reprogramming to naive pluripotency
Source: PubMed Central journal article supplement — Cell Rep Methods. 2022 Oct 17;2(11):100317. doi: 10.1016/j.crmeth.2022.100317 (PMC9701587; doi:10.1016/j.crmeth.2022.100317), 2022-10-17
Supplement: mmc1.pdf [file mmc1.pdf]

**Cell Reports Methods, Volume 2**

**Supplemental information**

**Improved Sendai viral system**

**for reprogramming to naive pluripotency**

**Akira Kunitomi, Ryoko Hirohata, Vanessa Arreola, Mitsujiro Osawa, Tomoaki M. Kato, Masaki Nomura, Jitsutaro Kawaguchi, Hiroto Hara, Kohji Kusano, Yasuhiro Takashima, Kazutoshi Takahashi, Keiichi Fukuda, Naoko Takasu, and Shinya Yamanaka**

**Figure S1**

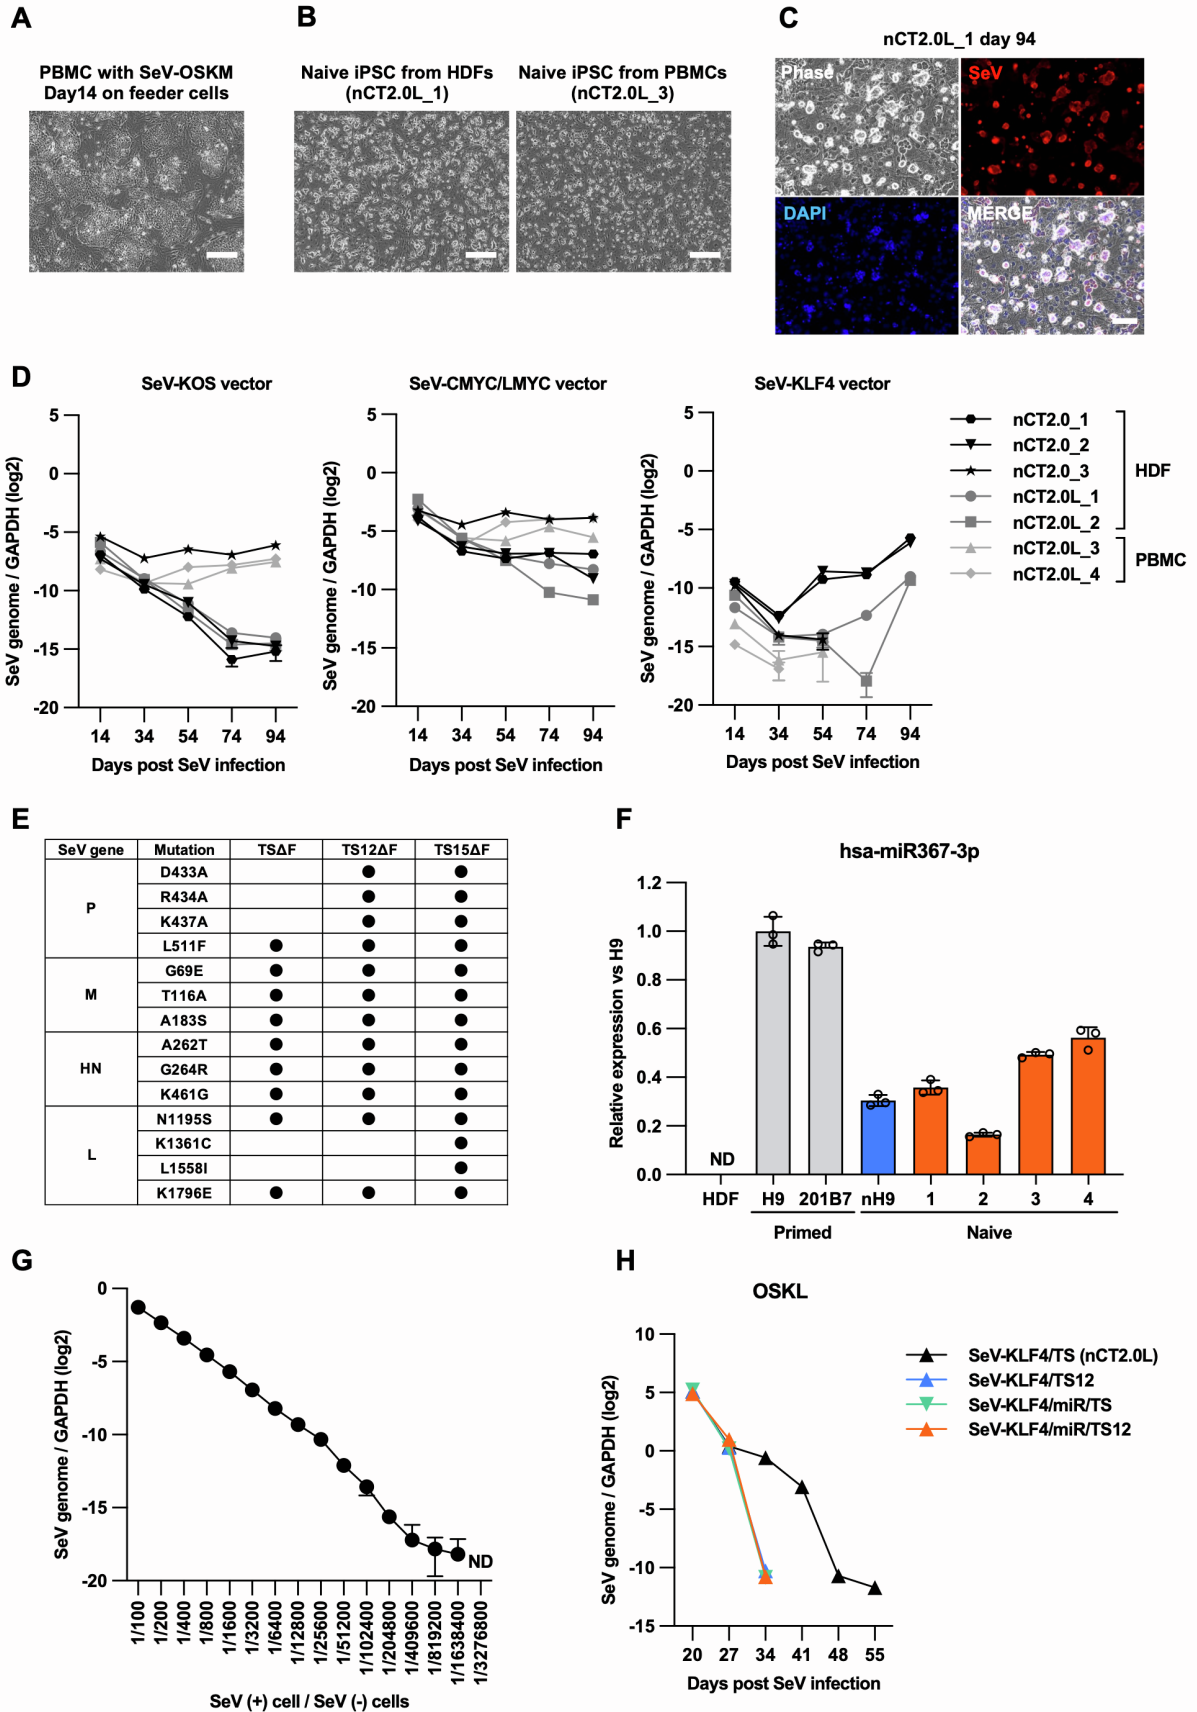

**Figure S1 related to Figure 1. Characterization of conventional and modified SeV-KLF4 vectors.**

(A) Representative phase-contrast image of PBMCs 14 days after CytoTune-iPS 2.0 SeV vector infection. Scale bar, 200  $\mu\text{m}$ .

(B) Representative phase-contrast image of naive human iPSCs derived from HDFs (nCT2.0L\_1) and PBMCs (nCT2.0L\_3) reprogrammed with CytoTune-iPS 2.0L. Scale bar, 200  $\mu\text{m}$ .

(C) Phase-contrast images of and immunofluorescent staining for SeV in naive human iPSCs (nCT2.0L\_1) 94 days after SeV infection. Scale bar, 100  $\mu\text{m}$ .

(D) qRT-PCR analysis of each SeV vector genome expression in naive human iPSCs reprogrammed with CytoTune2.0 or 2.0L normalized to the GAPDH expression. Data are shown as the mean  $\pm$  s.d.  $n=3$  for each point.

(E) Point mutations of SeV genes in the SeV-TS $\Delta$ F, SeV-TS12 $\Delta$ F and SeV-TS15 $\Delta$ F vectors.

(F) qRT-PCR analysis of hsa-miRNA367-3p expression in HDFs and PSCs normalized to hsa-miRNA423-3p expression using TaqMan probes. Data are shown as the mean  $\pm$  s.d.  $n=3$ . ND, not detected even after 40 amplification cycles.

(G) Sensitivity of detection of the SeV genome in cells 14 days after SeV vector infection analyzed by qRT-PCR using TaqMan probes. The X-axis shows the rate of SeV-positive cells among SeV-negative cells.

(H) qRT-PCR analysis of SeV genome expression in primed iPSCs derived from HDFs by the co-infection of SeV-KOS and SeV-LMYC with SeV-KLF4 vectors using TaqMan probe. Data are shown as the mean  $\pm$  s.d.  $n=3$  of each point.

Figure S2

A

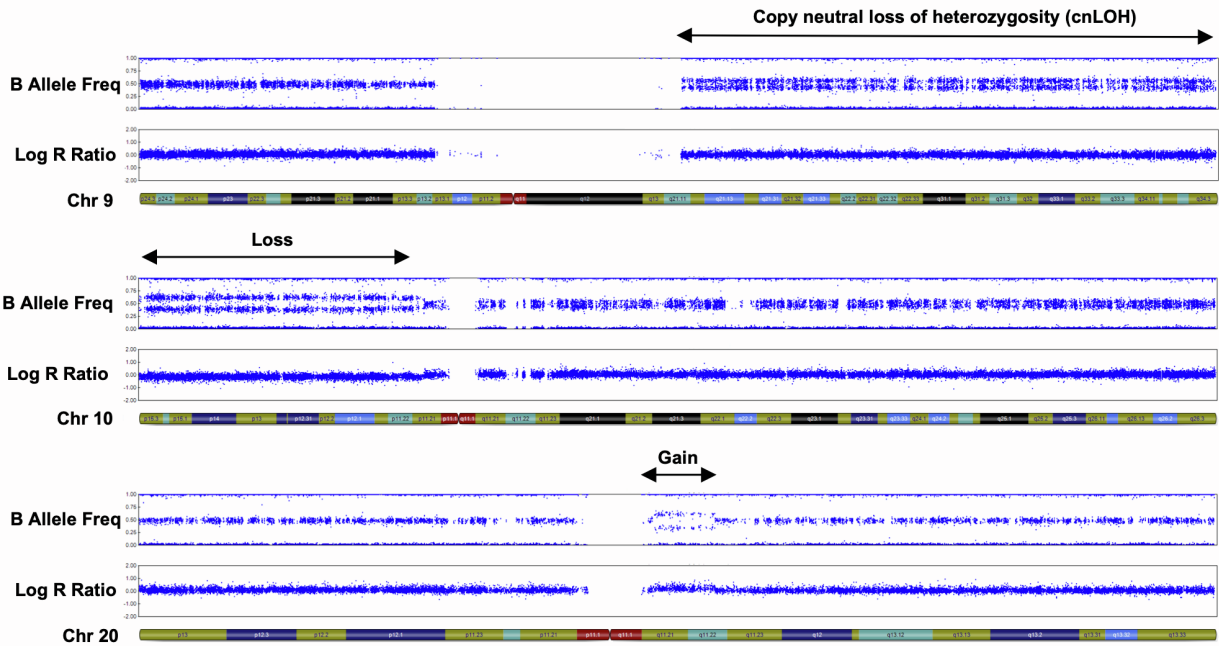

B

| No. | Type of CNV | Location                      | Size (bp)   | nH9 (p109) | nOSKL_1 (p45) | nOSKL_2 (p29) | nOSKL_3 (p18) | nOSKL_4 (p16) | nOSKL_FF_1 (p21) | nOSKL_FF_2 (p21) |
|-----|-------------|-------------------------------|-------------|------------|---------------|---------------|---------------|---------------|------------------|------------------|
| 1   | gain        | chr1:51,440,093-51,804,731    | 364,639     | -          | ○             | -             | -             | -             | ○                | -                |
| 2   | loss        | chr2:181,333,307-181,967,075  | 633,769     | -          | ○             | -             | -             | -             | -                | -                |
| 3   | loss        | chr3:60,305,117-60,518,998    | 213,882     | ○          | -             | -             | -             | -             | -                | -                |
| 4   | cnLOH       | chr3:60,542,151-60,597,001    | 54,851      | -          | -             | -             | -             | -             | ○                | -                |
| 5   | cnLOH       | chr5:58,428,799-58,620,440    | 191,642     | -          | ○             | -             | -             | -             | -                | -                |
| 6   | loss        | chr6:26,198,916-26,237,457    | 38,542      | -          | ○             | -             | -             | -             | -                | -                |
| 7   | loss        | chr6:162,392,902-162,914,986  | 522,085     | -          | ○             | -             | -             | -             | -                | -                |
| 8   | cnLOH       | chr9:68,167,130-141,066,491   | 72,899,362  | ○          | -             | -             | -             | -             | -                | -                |
| 9   | cnLOH       | chr9:71,100,140-141,066,491   | 69,966,352  | -          | -             | -             | -             | -             | ○                | ○                |
| 10  | loss        | chr10:98,087-23,539,203       | 23,441,117  | -          | -             | ○             | -             | -             | -                | -                |
| 11  | loss        | chr10:43,530,071-68,593,991   | 25,063,921  | -          | ○             | -             | -             | -             | -                | -                |
| 12  | loss        | chr10:68,259,319-68,461,866   | 202,548     | -          | -             | -             | -             | -             | -                | ○                |
| 13  | loss        | chr10:98,087-35,901,715       | 35,803,629  | ○          | -             | -             | -             | -             | -                | -                |
| 14  | cnLOH       | chr11:125,276,400-125,881,102 | 604,703     | -          | ○             | -             | -             | -             | -                | -                |
| 15  | gain        | chr12:191,619-14,939,009      | 14,747,391  | -          | ○             | -             | -             | -             | -                | -                |
| 16  | gain        | chr13:42,151,623-42,465,713   | 314,091     | -          | ○             | -             | -             | -             | -                | -                |
| 17  | cnLOH       | chr15:22,576,118-87,876,646   | 65,300,529  | ○          | -             | -             | -             | -             | -                | -                |
| 18  | cnLOH       | chr15:22,784,095-102,369,711  | 79,585,617  | -          | -             | -             | -             | ○             | -                | -                |
| 19  | gain        | chr18:6,873,354-7,688,505     | 815,152     | -          | ○             | -             | -             | -             | -                | -                |
| 20  | gain        | chr18:6,912,332-6,951,060     | 38,729      | -          | ○             | -             | -             | -             | -                | -                |
| 21  | cnLOH       | chr19:260,912-59,097,160      | 58,836,249  | -          | -             | -             | -             | ○             | -                | -                |
| 22  | gain        | chr20:30,183,598-33,720,033   | 3,536,436   | ○          | -             | -             | -             | -             | -                | -                |
| 23  | cnLOH       | chr22:43,767,079-51,195,728   | 7,428,650   | ○          | -             | -             | -             | -             | -                | -                |
| 24  | cnLOH       | chrX:2,715,425-58,339,545     | 55,624,121  | -          | ○             | -             | -             | -             | -                | -                |
| 25  | loss        | chrX:2,760,060-155,123,035    | 152,362,976 | ○          | -             | -             | -             | -             | -                | -                |
| 26  | loss        | chrX:32,003,841-32,116,068    | 112,228     | -          | ○             | -             | -             | -             | -                | ○                |
| 27  | cnLOH       | chrX:62,058,620-154,916,845   | 92,858,226  | -          | ○             | -             | -             | -             | -                | -                |

**Figure S2 related to Figure 2. SNP genotyping array results of naive PSCs in this study.**

- (A) Representative CNVs found in nH9 ESC: copy neutral loss of heterozygosity (cnLOH) in Chr 9, loss in Chr 10, gain in Chr 20.
- (B) All CNVs detected in the naive PSCs after reprogramming.
